# Supplementary material for: Functional Characterization, Antimicrobial Effects, and Potential Antibacterial Mechanisms of NpHM4, a Derived Peptide of Nautilus pompilius Hemocyanin
Source: MDPI journal article supplement (doi:10.3390/md20070459), 2022-07-16
Supplement: s1 [file s1]

# Supplementary Information

## Functional characterization, antimicrobial effects, and potential antibacterial mechanisms of *Np*HM4, a derived peptide of *Nautilus pompilius* hemocyanin

Chun Yuan <sup>1,2</sup>, Xiaoying Zheng <sup>1,3</sup>, Kunna Liu <sup>4,5</sup>, Wenbin Yuan <sup>1,3</sup>, Yang Zhang <sup>4,5</sup>, Fan Mao <sup>4,5,\*</sup> and Yongbo Bao <sup>1,2,\*</sup>

- <sup>1</sup> Zhejiang key Laboratory of Aquatic Germplasm Resources, College of Biological and Environmental Sciences, Zhejiang Wanli University, Ningbo 315100, China; 2020881038@zww.edu.cn (C.Y.); xyzheng20@163.com (X.Z.); yuanwenbin2021@163.com (W.Y.)
- <sup>2</sup> Ninghai Institute of Mariculture Breeding and Seed Industry, Zhejiang Wanli University, Ninghai 315604, China
- <sup>3</sup> School of Marine Science, Ningbo University, Ningbo 315211, China;
- <sup>4</sup> CAS Key Laboratory of Tropical Marine Bio-Resources and Ecology and Guangdong Provincial Key Laboratory of Applied Marine Biology, South China Sea Institute of Oceanology, Innovation Academy of South China Sea Ecology and Environmental Engineering, Chinese Academy of Sciences, Guangzhou 510301, China; liukunna18@mails.ucas.ac.cn (K.L.); yzhang@scsio.ac.cn (Y.Z.)
- <sup>5</sup> Southern Marine Science and Engineering Guangdong Laboratory (Guangzhou), Guangzhou 510301, China
- \* Correspondence: maofan@scsio.ac.cn (F.M.); baoyongbo@zww.edu.cn (Y.B.); Tel.: +86-20-8910-2507 (F.M.)

**Table S1. Prediction of antimicrobial peptides derived from hemocyanin of *N. pompilius*.**

| No. | Peptide sequence   | Pho% <sup>c</sup> | Net charge | Score | MW <sup>a</sup> | Secondary structure |
|-----|--------------------|-------------------|------------|-------|-----------------|---------------------|
| N1  | VFAGFMLHGFKKKSAL   | 60                | 2.25       | 0.975 | 1653.02         | $\alpha$ -helix     |
| N2  | FAGFMLHGFKKKSALV   | 60                | 2.25       | 0.967 | 1653.02         | $\alpha$ -helix     |
| N3  | GFKKSALVSFSIVHH    | 46                | 2.5        | 0.965 | 1656.94         | $\alpha$ -helix     |
| N4  | LHGFKKKSALVSFSIV   | 53                | 2.25       | 0.948 | 1632.96         | $\alpha$ -helix     |
| N5  | KALHRYACCIHGMAT    | 53                | 2.5        | 0.891 | 1675.02         | $\beta$ -chain      |
| N6  | FKKSALVSFSIVHHQ    | 46                | 2.5        | 0.882 | 1728.02         | $\alpha$ -helix     |
| N7  | GFLFHGIQASANVRI    | 53                | 1.25       | 0.882 | 1595.86         | $\alpha$ -helix     |
| N8  | RVFAGFMLHGFKKSA    | 53                | 3.25       | 0.875 | 1696.05         | $\alpha$ -helix     |
| N9  | RVFAGFLLHGIKRSA    | 53                | 3.25       | 0.874 | 1671.99         | $\alpha$ -helix     |
| N10 | FRLSGIHTSANVKVL    | 46                | 2.25       | 0.85  | 1641.93         | $\alpha$ -helix     |
| N11 | IFVPAHVKSMNISHK    | 46                | 2.5        | 0.839 | 1708.06         | $\alpha$ -helix     |
| N12 | IIPAPNIIFVPAHVK    | 60                | 1.25       | 0.835 | 1629.02         | -                   |
| N13 | FVPAHVKSMNISHKG    | 40                | 2.5        | 0.821 | 1651.95         | -                   |
| N14 | RIFAGFLLHIGIQSA    | 53                | 1.25       | 0.804 | 1586.85         | $\alpha$ -helix     |
| N15 | RISGGPIIRKNINKL    | 33                | 4          | 0.802 | 1679.04         | -                   |
| N16 | ANVRIYICVPTQRGS    | 40                | 2          | 0.784 | 1676.96         | -                   |
| N17 | RIWAIWQALQIYRGK    | 53                | 3          | 0.781 | 1902.28         | $\alpha$ -helix     |
| N18 | FLFWGIHTSANVKVF    | 60                | 1.25       | 0.778 | 1766.07         | $\alpha$ -helix     |
| N19 | QCKPYACCQHGMPTF    | 40                | 1.25       | 0.769 | 1714.05         | -                   |
| N20 | GFLFWGIHTSANVKV    | 53                | 1.25       | 0.764 | 1675.95         | $\alpha$ -helix     |
| N21 | FASFRLSGIHTSANVKVL | 46                | 1.25       | 0.752 | 1947.27         | $\alpha$ -helix     |
| N22 | QIDRKNLVVRKDLRR    | 33                | 4          | 0.746 | 1909.27         | -                   |
| N23 | NRVFAGFMLHGFKKKS   | 46                | 3.25       | 0.726 | 1739.07         | $\alpha$ -helix     |
| N24 | MLHGFKKKSALVSFSI   | 53                | 2.25       | 0.702 | 1665.03         | $\alpha$ -helix     |
| N25 | VFAGFLLHGIKRSAD    | 53                | 1.25       | 0.669 | 1630.91         | $\alpha$ -helix     |
| N26 | PLCPNPKALHRYACC    | 46                | 2.25       | 0.659 | 1686.06         | -                   |
| N27 | FAGFLLHGIKRSADV    | 53                | 1.25       | 0.656 | 1630.91         | $\alpha$ -helix     |
| N28 | GLPLQCKPYACCQHG    | 40                | 1.25       | 0.649 | 1617.94         | -                   |
| N29 | AIWQALQIYRGKHYL    | 46                | 2.25       | 0.646 | 1860.19         | $\alpha$ -helix     |
| N30 | AIAAYHGLPLQCKPY    | 46                | 1.25       | 0.623 | 1644.96         | -                   |
| N31 | IIWQELQKIRGLSGH    | 40                | 1.25       | 0.622 | 1778.09         | $\alpha$ -helix     |
| N32 | YHGLPLQCKPYACCQ    | 40                | 1.25       | 0.601 | 1724.06         | -                   |
| N33 | IWQALQIYRGKHYLA    | 46                | 2.25       | 0.598 | 1860.19         | $\alpha$ -helix     |
| N34 | EINRRRSRNRVFAGF    | 33                | 4          | 0.583 | 1878.14         | -                   |
| N35 | GFLFHGIKRSADVNF    | 46                | 1.25       | 0.581 | 1673.94         | $\alpha$ -helix     |
| N36 | LQCKPYACCQHGMPT    | 40                | 1          | 0.579 | 1680.03         | -                   |
| N37 | PLQCKPYACCQHGMPT   | 40                | 1.25       | 0.558 | 1676.04         | -                   |
| N38 | ALQIYRGKHYLAHCA    | 46                | 2.5        | 0.537 | 1744.05         | $\alpha$ -helix     |

| No. | Peptide sequence | Pho% <sup>c</sup> | Net charge | Score | MW <sup>a</sup> | Secondary structure |
|-----|------------------|-------------------|------------|-------|-----------------|---------------------|
| N39 | ISGGPIIRKNINKLT  | 33                | 3          | 0.529 | 1623.96         | -                   |
| N40 | KIHSRQSHPRVFAGF  | 33                | 3.5        | 0.522 | 1767.03         | $\alpha$ -helix     |
| N41 | PNPKALHRYACCIHG  | 40                | 2.5        | 0.519 | 1679.99         | $\beta$ -chain      |
| N42 | HQIDRKNLVVRKDLR  | 33                | 3.25       | 0.515 | 1890.22         | -                   |
| N43 | IWQALQQYRRIPYNK  | 33                | 3          | 0.513 | 1977.30         | $\alpha$ -helix     |
| N44 | RNRVFAGFMLHGFKK  | 46                | 4.25       | 0.499 | 1808.18         | $\alpha$ -helix     |

<sup>a</sup> MW, molecular weight (g/mol) predicted via APD3.

<sup>c</sup> Pho%, the percentage of hydrophobic residues.

“-” indicates the structure of the predicted peptide was unclear.

**Table S2. Predictive antimicrobial peptides synthesized after screening.**

| No.           | Peptide sequence   | Pho% <sup>c</sup> | Net charge | Score | Measured MW <sup>a</sup> | Secondary structure |
|---------------|--------------------|-------------------|------------|-------|--------------------------|---------------------|
| <i>Np</i> HN1 | VFAGFMLHGFKKSALV   | 62                | 2.25       | 0.975 | 1752.13                  | $\alpha$ -helix     |
| <i>Np</i> HN2 | FASFRLSGIHTSANVKVL | 50                | 2.25       | 0.894 | 1947.24                  | $\alpha$ -helix     |
| <i>Np</i> HN3 | KALHRYACCIHGMAT    | 53                | 2.5        | 0.891 | 1675.02                  | $\beta$ -chain      |
| <i>Np</i> HN4 | GFLFHGIQASANVRI    | 53                | 1.25       | 0.882 | 1595.86                  | $\alpha$ -helix     |
| <i>Np</i> HN5 | RVFAGFLLHGIKRSA    | 53                | 3.25       | 0.874 | 1671.99                  | $\alpha$ -helix     |
| <i>Np</i> HN6 | RIFAGFLLHGIGQSA    | 53                | 1.25       | 0.804 | 1586.85                  | $\alpha$ -helix     |

<sup>a</sup> MW, molecular weight (g/mol) measured via mass spectroscopy (MS).

<sup>c</sup> Pho%, the percentage of hydrophobic residues.

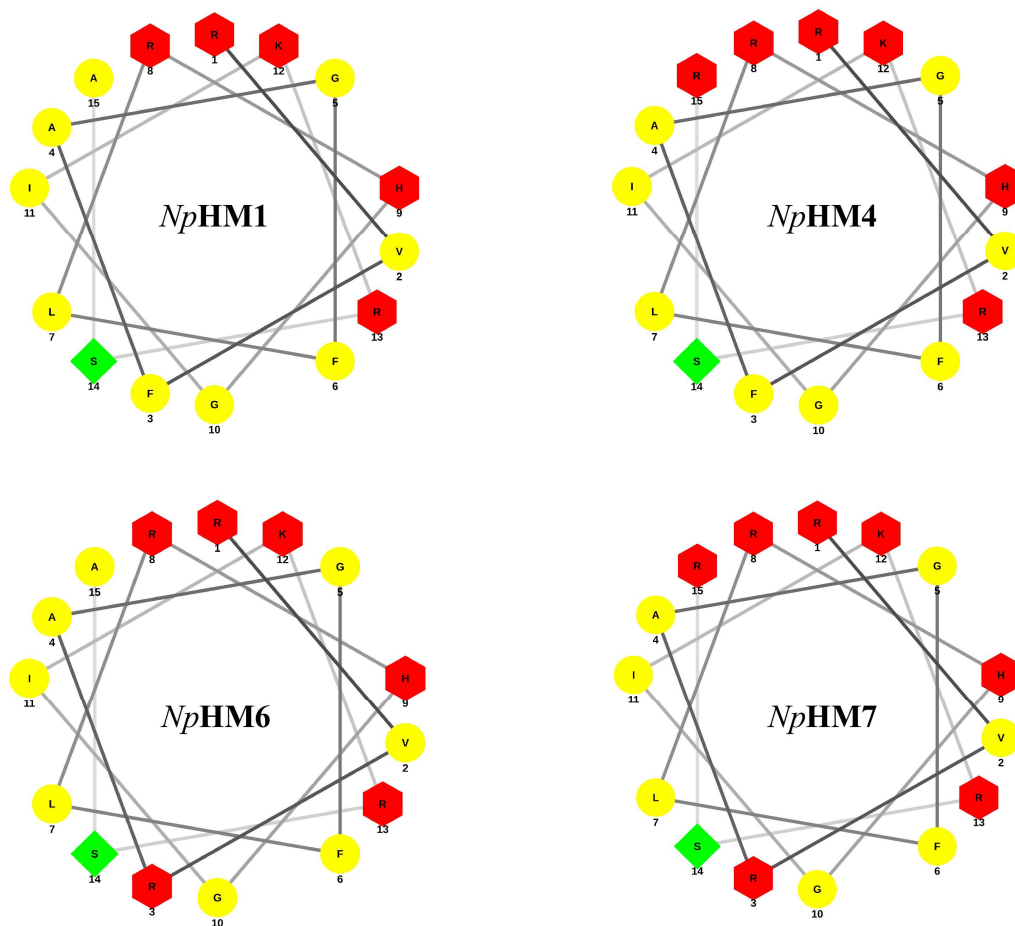

**Figure S1.** Helical wheel projections of *NpHM1*, *NpHM4*, *NpHM6*, and *NpHM7*. Positively charged residues are presented in red, hydrophobic residues are shown in yellow, and uncharged polar residues are shown in green. The numbers represent the positions of amino acid residues.



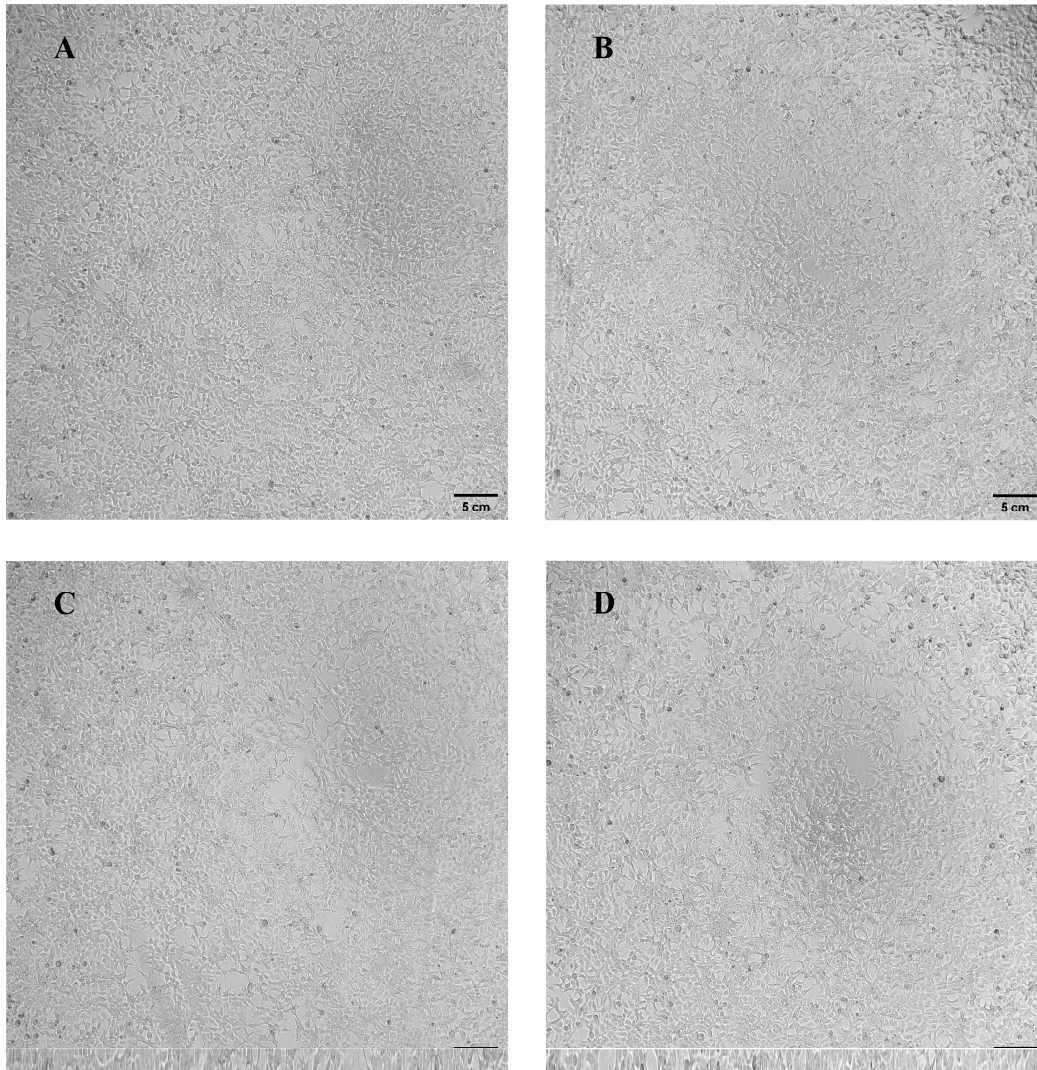

**Figure S2.** Cytotoxicity of *NpHM4* against HEK293 cells. (A-D) Representative images of *NpHM4*-treated HEK293 cells at 24 h post treatment. (A) Untreated (control); (B) 30  $\mu\text{M}$  *NpHM4*; (C) 90  $\mu\text{M}$  *NpHM4*; (D) 180  $\mu\text{M}$  *NpHM4*.
